1 **Broad spectrum capture of clinical pathogens using engineered Fc-**  
2 **Mannose-Binding Lectin (FcMBL) enhanced by antibiotic treatment**

3

4 Benjamin T. Seiler<sup>1</sup>, Mark Cartwright<sup>1</sup>, Alexandre L.M. Dinis<sup>1</sup>, Shannon Duffy<sup>1</sup>,  
5 Patrick Lombardo<sup>1</sup>, David Cartwright<sup>1</sup>, Elana H. Super<sup>1</sup>, Jacqueline Lanzaro<sup>1</sup>,  
6 Kristen Dugas<sup>1</sup>, Michael Super<sup>1,2</sup>, and Donald E. Ingber<sup>1,2,3\*</sup>

7

8 <sup>1</sup>Wyss Institute for Biologically Inspired Engineering, Harvard University, Boston,  
9 Massachusetts, United States of America

10

11 <sup>2</sup>Vascular Biology Program, Boston Children's Hospital and Harvard Medical  
12 School, Boston, Massachusetts, United States of America

13

14 <sup>3</sup>Harvard John A. Paulson School of Engineering and Applied Sciences, Harvard  
15 University, Cambridge, Massachusetts, United States of America

16

17

18

19 \*Donald E. Ingber, MD, PhD

20 email: [don.ingber@wyss.harvard.edu](mailto:don.ingber@wyss.harvard.edu) (DEI)

21

22

23

## 24 **Abstract**

25 FcMBL, an engineered version of the blood opsonin mannose-binding  
26 lectin (MBL) that contains the carbohydrate recognition domain (CRD) and  
27 flexible neck regions of MBL fused to the Fc portion of human IgG1, has been  
28 shown to bind various microbes and pathogen-associated molecular patterns  
29 (PAMPs). FcMBL also has been used to create an enzyme-linked lectin sorbent  
30 assay (ELLeCSA) for use as a rapid (< 1 hr) diagnostic of bloodstream infections.  
31 Here we extended this work by using the ELLeCSA to test FcMBL's ability to bind  
32 to more than 200 different isolates from over 100 different pathogen species.  
33 FcMBL bound to 86% of the isolates and 110 of the 122 (90%) different pathogen  
34 species tested, including bacteria, fungi, viruses, and parasites. It also bound to  
35 PAMPs including, lipopolysaccharide endotoxin (LPS) and lipoteichoic acid (LTA)  
36 from Gram-negative and Gram-positive bacteria, as well as lipoarabinomannan  
37 (LAM) and phosphatidylinositol mannoside 6 (PIM<sub>6</sub>) from *Mycobacterium*  
38 *tuberculosis*. The efficiency of pathogen detection and variation between binding  
39 of different strains of the same species also could be improved by treating the  
40 bacteria with antibiotics prior to FcMBL capture to reveal previously concealed  
41 binding sites within the bacterial cell wall. As FcMBL can bind to pathogens and  
42 PAMPs in urine as well as blood, its broad-binding capability could be leveraged  
43 to develop a variety of clinically relevant technologies, including infectious  
44 disease diagnostics, therapeutics, and vaccines.

45

46

## 47 **Introduction**

48  
49 Mannose-binding lectin (MBL) is a key host-defense protein associated  
50 with the lectin pathway of the innate immune system [1], and deficiency of MBL  
51 can lead to increased susceptibility to a wide-spectrum of infectious diseases [2-  
52 4]. MBL functions as a calcium-dependent, pattern-recognition opsonin that binds  
53 a range of carbohydrate molecules associated with the surfaces or cell walls of  
54 many different types of pathogens [5]. Collectively these microbial surface  
55 carbohydrate molecules, including for example, lipoteichoic acid (LTA) and  
56 lipopolysaccharide endotoxin (LPS), are referred to as pathogen-associated  
57 molecular patterns (PAMPs) [6,7]. MBL has the intrinsic ability to distinguish  
58 foreign PAMPs from self, subsequently activating the complement system and  
59 providing protection via antibody-dependent and independent mechanisms [8,9].

60 Due to the evolutionary conserved recognition carbohydrate moieties of  
61 PAMPs, MBL is a broad spectrum opsonin that can bind over 90 different species  
62 of pathogens, including Gram-negative and Gram-positive bacteria, fungi,  
63 viruses, and parasites [10-14]. MBL binding to these various pathogens has been  
64 demonstrated by means of flow cytometry [14,15], radio-immunoassay [13,16],  
65 enzyme-linked immunosorbent assay (ELISA) [13,17], immunofluorescence and  
66 scanning electron microscopy (SEM) [18], and *Saccharomyces cerevisiae*-  
67 induced MBL activation and bystander lysis of chicken erythrocytes [19].  
68 However, many discrepancies in MBL binding have been described, depending  
69 on the method used. For example, use of flow cytometry revealed little to no MBL

70 binding to *Pseudomonas aeruginosa*, while others have reported good binding of  
71 MBL to *Pseudomonas aeruginosa* using a hemolytic assay [15,19].

72 We set out to address these conflicting results by leveraging recent  
73 development of an engineered version of MBL that contains the carbohydrate  
74 recognition domain (CRD) and flexible neck regions of MBL fused to the Fc  
75 portion of human IgG1, which is known as FcMBL [20]. The engineered FcMBL  
76 lacks the regions of the native molecule that interact with MBL-associated serine  
77 proteases (MASPs) that activate complement and promote blood coagulation,  
78 and thus, it can be used to capture of PAMPs from complex biological fluids,  
79 such as blood and urine, without activating effector functions of complement,  
80 coagulation, and phagocytosis. We have previously used FcMBL in  
81 extracorporeal therapies, such as hemofiltration, and in diagnostics to capture  
82 and detect *Staphylococcus aureus* from osteoarticular and synovial fluids of  
83 infected patients [20-22]. In the present study, we used a previously described  
84 sandwich enzyme-linked lectin sorbent assay (ELLeCSA) in which both live and  
85 fragmented pathogens (PAMPs) are captured magnetically using FcMBL  
86 conjugated to magnetic beads and then detected with horseradish peroxidase  
87 (HRP)-labeled MBL [23]. This ELLeCSA has enabled rapid (< 1 hr) diagnosis of  
88 bloodstream infections by capturing and detecting PAMPs in whole blood from  
89 human patients [23]. Here we use this ELLeCSA to measure direct binding of  
90 FcMBL to over 200 pathogen isolates from over 100 different pathogen species,  
91 including bacteria, fungi, viruses, and parasites, as well as bacterial cell wall  
92 antigens. We demonstrate that FcMBL binds 90% of the pathogen species tested

93 and that antibiotic treatment of the bacterial pathogens exposes previously  
94 concealed FcMBL binding sites on cell walls, thus increasing the efficiency of  
95 pathogen detection and reducing variation between binding of different strains of  
96 the same species. We also show FcMBL can detect PAMPs in urine as well as  
97 blood, making this potential diagnostic technology highly synergistic with  
98 standard of care antibiotic therapy.

99

## 100 **Results**

### 101 **FcMBL binding to bacteria**

102 We first set out to determine the range of pathogens that FcMBL can  
103 capture by screening multiple species of bacteria, fungi, viruses, and parasites  
104 using the ELLeCSA detection technology. In the FcMBL ELLeCSA, pathogen  
105 materials in experimental samples are captured with FcMBL immobilized on  
106 superparamagnetic beads (1  $\mu\text{m}$  diameter), magnetically separated, washed,  
107 bound to human MBL linked to horseradish peroxidase (HRP), magnetically  
108 separated again, washed, and then tetramethylbenzidine (TMB) substrate is  
109 added to quantify the amount of pathogen material bound (**Fig 1**). Initially our  
110 focus was on screening bacteria and as such we compiled a comprehensive list  
111 of clinically relevant bacterial pathogens (**Table 1**). When we screened 88  
112 different species of bacteria, we found that FcMBL detected 69 out of 88 live  
113 microbes (78%) and that more could be detected (76 out of 88; 86%) after they  
114 were treated with antibiotics (**Table 1**). The antibiotics we used in this study were  
115 clinical grade cefepime, ceftriaxone, meropenem, amikacin, and vancomycin, to

116 provide enough coverage to target this diverse range of bacteria. We dosed each  
117 bacterial class with a single appropriate antibiotic at a dose (1 mg/mL) much  
118 higher than their minimal inhibitory concentrations (MIC) to obtain acute  
119 fragmentation within 4 hours. *Pseudomonas* was treated with the 4<sup>th</sup> generation  
120 cephalosporin, cefepime, due to weak coverage by 3<sup>rd</sup> generation ceftriaxone,  
121 and methicillin-resistant *Staphylococcus aureus* (MRSA) was treated with  
122 vancomycin.

123

124 **Fig 1. Diagrammatic representation of the FcMBL ELLeC<sub>SA</sub>.** An N-terminal  
125 aminoxy-biotin on the Fc allows oriented attachment to streptavidin coated  
126 superparamagnetic beads (FcMBL Bead). FcMBL beads capture live and  
127 fragmented bacteria, which are then magnetically separated and detected using  
128 recombinant human MBL linked to horseradish peroxidase (Human MBL-HRP).  
129 Tetramethylbenzidine (TMB) substrate is added to quantify captured bacteria and  
130 results are read at OD 450nm.

131

132

133

134

135

136

137

138 **Table 1. FcMBL binding profile of bacteria, fungi, viruses, parasites, and**  
 139 **bacterial antigens determined by FcMBL ELLeCSA.**

| Bacteria               |                             |           |           |                   | Bacteria                 |                           |           |           |                   | Fungi                |                       |           |           | Virus                          |                       |           |         |
|------------------------|-----------------------------|-----------|-----------|-------------------|--------------------------|---------------------------|-----------|-----------|-------------------|----------------------|-----------------------|-----------|-----------|--------------------------------|-----------------------|-----------|---------|
| Genus                  | Species                     | # of Isol | Live Data | Fragment Detected | Genus                    | Species                   | # of Isol | Live Data | Fragment Detected | Genus                | Species               | # of Isol | Live Data | Species                        | Antigen               | # of Isol | Detecte |
| <i>Acinetobacter</i>   | <i>baumannii</i>            | 3         | 1         | 2                 | <i>Mycobacterium</i>     | <i>bovis</i>              | 1         | *NT       | 1                 | <i>Aspergillus</i>   | <i>fumigatus</i>      | 1         | 1         | <i>Chikungunya</i>             | <i>E1</i>             | 1         | 0       |
| <i>Acinetobacter</i>   | <i>calcoaceticus</i>        | 1         | 1         | 1                 | <i>Mycobacterium</i>     | <i>leprae</i>             | 2         | *NT       | 2                 | <i>Aspergillus</i>   | <i>niger</i>          | 1         | 1         | <i>Cytomegalovirus</i>         | <i>gB</i>             | 1         | 1       |
| <i>Acinetobacter</i>   | <i>lwoffii</i>              | 1         | 1         | 1                 | <i>Mycobacterium</i>     | <i>tuberculosis</i>       | 2         | *NT       | 2                 | <i>Aureobasidium</i> | <i>pullulans</i>      | 1         | 1         | <i>Dengue</i>                  | <i>Serotype 1 VLP</i> | 1         | 1       |
| <i>Achromobacter</i>   | <i>xylosoxidans</i>         | 1         | 1         | 1                 | <i>Neisseria</i>         | <i>meningitidis</i>       | 1         | 1         | 1                 | <i>Candida</i>       | <i>albicans</i>       | 2         | 2         | <i>Ebola</i>                   | <i>GP1</i>            | 1         | 1       |
| <i>Actinobacillus</i>  | <i>pleuropneumoniae</i>     | 1         | 1         | 1                 | <i>Propionibacterium</i> | <i>acnes</i>              | 1         | 1         | 1                 | <i>Candida</i>       | <i>auris</i>          | 1         | 1         | <i>HIV</i>                     | <i>gp120</i>          | 1         | 1       |
| <i>Aerococcus</i>      | <i>viridans</i>             | 1         | 1         | 1                 | <i>Proteus</i>           | <i>mirabilis</i>          | 4         | 0         | 0                 | <i>Candida</i>       | <i>glabrata</i>       | 1         | 1         | <i>Influenza</i>               | <i>hemagglutinin</i>  | 1         | 1       |
| <i>Aeromonas</i>       | <i>hydrophila</i>           | 1         | 1         | 1                 | <i>Proteus</i>           | <i>vulgaris</i>           | 1         | 0         | 0                 | <i>Candida</i>       | <i>guilliermondii</i> | 1         | 1         | <i>Influenza</i>               | <i>neuraminidase</i>  | 1         | 1       |
| <i>Aeromonas</i>       | <i>sobria</i>               | 1         | 1         | 1                 | <i>Providencia</i>       | <i>rettgeri</i>           | 1         | 0         | 0                 | <i>Candida</i>       | <i>kefyi</i>          | 1         | 1         | <i>Respiratory Syncytial</i>   | <i>gp g</i>           | 1         | 1       |
| <i>Aeromonas</i>       | <i>veronii</i>              | 1         | 1         | 1                 | <i>Providencia</i>       | <i>stuartii</i>           | 1         | 1         | 1                 | <i>Candida</i>       | <i>krusei</i>         | 1         | 1         | <i>Tick-borne Encephalitis</i> | <i>NS1</i>            | 1         | 0       |
| <i>Alcaligenes</i>     | <i>faecalis</i>             | 1         | 0         | 1                 | <i>Pseudomonas</i>       | <i>aeruginosa</i>         | 6         | 6         | 6                 | <i>Candida</i>       | <i>parapsilosis</i>   | 1         | 1         | <i>Zika</i>                    | <i>lyase</i>          | 1         | 1       |
| <i>Bacillus</i>        | <i>anthracis</i>            | 1         | 1         | 1                 | <i>Pseudomonas</i>       | <i>putida</i>             | 1         | 1         | 1                 | <i>Candida</i>       | <i>tropicalis</i>     | 1         | 1         |                                |                       |           |         |
| <i>Bacillus</i>        | <i>cereus</i>               | 1         | 1         | 1                 | <i>Pseudomonas</i>       | <i>stutzeri</i>           | 1         | 0         | 1                 | <i>Cladosporium</i>  | <i>sp.</i>            | 1         | 1         |                                |                       |           |         |
| <i>Bacillus</i>        | <i>subtilis</i>             | 1         | 1         | 1                 | <i>Rothia</i>            | <i>mucilaginoso</i>       | 1         | 1         | 1                 | <i>Fusarium</i>      | <i>sp.</i>            | 1         | 1         |                                |                       |           |         |
| <i>Bacillus</i>        | <i>thurigiensis</i>         | 1         | 1         | 1                 | <i>Salmonella</i>        | <i>enteritidis</i>        | 2         | 1         | 2                 | <i>Mucor</i>         | <i>circinelloides</i> | 1         | 1         |                                |                       |           |         |
| <i>Bacteroides</i>     | <i>fragilis</i>             | 1         | 1         | 1                 | <i>Salmonella</i>        | <i>paratyphi A</i>        | 2         | 1         | 2                 | <i>Penicillium</i>   | <i>chrysogenum</i>    | 1         | 1         |                                |                       |           |         |
| <i> Bartonella</i>     | <i>henselae</i>             | 1         | 1         | 1                 | <i>Salmonella</i>        | <i>typhi</i>              | 1         | 1         | 1                 | <i>Penicillium</i>   | <i>commune</i>        | 1         | 1         | <i>Plasmodium</i>              | <i>falciparum</i>     | 1         | 0       |
| <i>Burkholderia</i>    | <i>cepacia</i>              | 1         | 1         | 1                 | <i>Salmonella</i>        | <i>typhimurium</i>        | 6         | 5         | 6                 | <i>Penicillium</i>   | <i>roqueforti</i>     | 1         | 1         | <i>Trichomonas</i>             | <i>vaginalis</i>      | 1         | 1       |
| <i>Cardiobacterium</i> | <i>hominis</i>              | 1         | 0         | 1                 | <i>Serratia</i>          | <i>marcescens</i>         | 5         | 3         | 3                 | <i>Rhinocladella</i> | <i>similis</i>        | 1         | 1         |                                |                       |           |         |
| <i>Corynebacterium</i> | <i>amycolatum</i>           | 1         | 1         | 1                 | <i>Shigella</i>          | <i>flexneri</i>           | 1         | 1         | 1                 | <i>Rhodotorula</i>   | <i>mucilaginoso</i>   | 1         | 1         |                                |                       |           |         |
| <i>Corynebacterium</i> | <i>minutissimum</i>         | 1         | 1         | 1                 | <i>Staphylococcus</i>    | <i>aureus</i>             | 17        | 15        | 16                | <i>Saccharomyces</i> | <i>boulardii</i>      | 1         | 1         |                                |                       |           |         |
| <i>Corynebacterium</i> | <i>pseudodiphtheriticum</i> | 1         | 1         | 1                 | <i>Staphylococcus</i>    | <i>aureus (MRSA)</i>      | 3         | 3         | 3                 | <i>Saccharomyces</i> | <i>cerevisiae</i>     | 1         | 1         |                                |                       |           |         |
| <i>Corynebacterium</i> | <i>striatum</i>             | 1         | 1         | 1                 | <i>Staphylococcus</i>    | <i>caprae</i>             | 1         | 0         | 1                 | <i>Torulasporea</i>  | <i>detbrueckii</i>    | 1         | 1         |                                |                       |           |         |
| <i>Clostridium</i>     | <i>difficile</i>            | 1         | 1         | 1                 | <i>Staphylococcus</i>    | <i>cohnii</i>             | 1         | 1         | 1                 |                      |                       |           |           |                                |                       |           |         |
| <i>Clostridium</i>     | <i>perfringens</i>          | 1         | 1         | 1                 | <i>Staphylococcus</i>    | <i>epidermidis</i>        | 4         | 2         | 2                 |                      |                       |           |           |                                |                       |           |         |
| <i>Citrobacter</i>     | <i>freundii</i>             | 1         | 1         | *NT               | <i>Staphylococcus</i>    | <i>haemolyticus</i>       | 1         | 0         | 1                 |                      |                       |           |           |                                |                       |           |         |
| <i>Citrobacter</i>     | <i>koseri</i>               | 1         | 1         | 1                 | <i>Staphylococcus</i>    | <i>hominis</i>            | 2         | 0         | 1                 |                      |                       |           |           |                                |                       |           |         |
| <i>Elkanella</i>       | <i>corrodens</i>            | 1         | 1         | 1                 | <i>Staphylococcus</i>    | <i>intermedius</i>        | 1         | 1         | 1                 |                      |                       |           |           |                                |                       |           |         |
| <i>Enterobacter</i>    | <i>aerogenes</i>            | 4         | 2         | 4                 | <i>Staphylococcus</i>    | <i>lugdunensis</i>        | 2         | 1         | *NT               |                      |                       |           |           |                                |                       |           |         |
| <i>Enterobacter</i>    | <i>cloacae</i>              | 8         | 5         | 8                 | <i>Staphylococcus</i>    | <i>simulans</i>           | 1         | 1         | *NT               |                      |                       |           |           |                                |                       |           |         |
| <i>Enterococcus</i>    | <i>avium</i>                | 1         | 1         | 1                 | <i>Staphylococcus</i>    | <i>warneri</i>            | 1         | 0         | 0                 |                      |                       |           |           |                                |                       |           |         |
| <i>Enterococcus</i>    | <i>caselliflavus</i>        | 1         | 1         | 1                 | <i>Stenotrophomonas</i>  | <i>malophilia</i>         | 1         | 0         | 0                 |                      |                       |           |           |                                |                       |           |         |
| <i>Enterococcus</i>    | <i>faecalis</i>             | 5         | 0         | 0                 | <i>Streptococcus</i>     | <i>agalactiae</i>         | 2         | 0         | 2                 |                      |                       |           |           |                                |                       |           |         |
| <i>Enterococcus</i>    | <i>faecium</i>              | 1         | 0         | 0                 | <i>Streptococcus</i>     | <i>anginosus</i>          | 1         | 1         | 1                 |                      |                       |           |           |                                |                       |           |         |
| <i>Enterococcus</i>    | <i>gallinarum</i>           | 1         | 0         | 0                 | <i>Streptococcus</i>     | <i>bovis</i>              | 1         | 1         | 1                 |                      |                       |           |           |                                |                       |           |         |
| <i>Escherichia</i>     | <i>coli</i>                 | 28        | 11        | 26                | <i>Streptococcus</i>     | <i>Group A</i>            | 1         | 1         | 1                 |                      |                       |           |           |                                |                       |           |         |
| <i>Kingella</i>        | <i>kingae</i>               | 2         | 1         | 1                 | <i>Streptococcus</i>     | <i>Group B</i>            | 1         | 1         | 1                 |                      |                       |           |           |                                |                       |           |         |
| <i>Klebsiella</i>      | <i>oxytoca</i>              | 7         | 4         | 7                 | <i>Streptococcus</i>     | <i>Group C</i>            | 1         | 1         | 1                 |                      |                       |           |           |                                |                       |           |         |
| <i>Klebsiella</i>      | <i>pneumoniae</i>           | 9         | 6         | 9                 | <i>Streptococcus</i>     | <i>oxygalactiae</i>       | 1         | 1         | 1                 |                      |                       |           |           |                                |                       |           |         |
| <i>Lactococcus</i>     | <i>lactis</i>               | 1         | 1         | 1                 | <i>Streptococcus</i>     | <i>mitis</i>              | 1         | 0         | 0                 |                      |                       |           |           |                                |                       |           |         |
| <i>Laribacter</i>      | <i>hongkongensis</i>        | 1         | 1         | 1                 | <i>Streptococcus</i>     | <i>pneumoniae</i>         | 10        | 7         | 7                 |                      |                       |           |           |                                |                       |           |         |
| <i>Listeria</i>        | <i>monocytogenes</i>        | 1         | 1         | 1                 | <i>Streptococcus</i>     | <i>pyogenes</i>           | 1         | 1         | 1                 |                      |                       |           |           |                                |                       |           |         |
| <i>Micrococcus</i>     | <i>sp.</i>                  | 1         | 1         | 1                 | <i>Streptococcus</i>     | <i>sanguinis</i>          | 1         | 1         | 1                 |                      |                       |           |           |                                |                       |           |         |
| <i>Moraxella</i>       | <i>catarrhalis</i>          | 1         | 1         | 1                 | <i>Streptococcus</i>     | <i>viridans</i>           | 2         | 1         | 2                 |                      |                       |           |           |                                |                       |           |         |
| <i>Morganella</i>      | <i>morganii</i>             | 1         | 1         | 1                 | <i>Yersinia</i>          | <i>pseudotuberculosis</i> | 6         | 6         | 6                 |                      |                       |           |           |                                |                       |           |         |

\*NT - Not Tested

140  
 141 Multiple species of bacteria, including multiple isolates (# of isolates), were  
 142 screened to determine FcMBL binding. Total number detected of both live and  
 143 fragmented bacterial isolates is shown. Fungi were screened and total number  
 144 detected for live isolates shown. Purified or inactivated viral, parasite, and  
 145 bacterial antigens were tested directly in TBST 5mM CaCl<sub>2</sub> buffer, and number  
 146 detected shown. Test samples were performed in duplicate. \*NT indicates not  
 147 tested.

148  
 149 To determine if inducing bacterial fragmentation via antibiotic treatment  
 150 would produce different effects on FcMBL detection sensitivity when tested using

151 different strains of the same species, we screened 137 isolates from 22 of the 88  
152 Gram-positive and Gram-negative bacterial species, including antibiotic-resistant  
153 organisms (e.g., MRSA) (**Fig 2**). As before, FcMBL bound a greater proportion of  
154 the pathogens when fragmented with antibiotic treatment ( $115/137 = 84\%$ ) than  
155 when live and intact ( $80/137 = 58\%$ ). For some bacterial species such as  
156 *Enterobacter cloacae*, *Escherichia coli*, *Klebsiella oxytoca*, and *Klebsiella*  
157 *pneumoniae* we found antibiotic-induced fragmentation greatly increased FcMBL  
158 binding, whereas other bacteria like *Pseudomonas aeruginosa*, *Yersinia*  
159 *pseudotuberculosis*, and MRSA bound equally well when live and intact (**Fig 2**).  
160 With the exception of *Proteus mirabilis* and *Enterococcus faecalis*, which FcMBL  
161 did not bind at all, the capture of fragmented bacteria was equal to or greater  
162 than that of live bacteria.

163

164 **Fig 2. FcMBL binding to bacterial isolates is equal to or enhanced with**  
165 **antibiotic fragmentation.** Graph is divided between Gram-negative bacterial  
166 isolates [Gram (-)] and Gram-positive bacterial isolates [Gram (+)]. Data are  
167 presented as the number of bacterial isolates bound live and fragmented within  
168 the total isolates tested for each species: *A. baumannii* ( $n = 3$ ), *E. aerogenes* ( $n =$   
169  $4$ ), *E. cloacae* ( $n = 8$ ), *E. coli* ( $n = 28$ ), *K. kingae* ( $n = 2$ ), *K. oxytoca* ( $n = 7$ ), *K.*  
170 *pneumoniae* ( $n = 9$ ), *P. mirabilis* ( $n = 4$ ), *P. aeruginosa* ( $n = 6$ ), *S. enteritidis* ( $n =$   
171  $2$ ), *S. paratyphi A* ( $n = 2$ ), *S. typhimurium* ( $n = 6$ ), *S. marcescens* ( $n = 5$ ), *Y.*  
172 *pseudotuberculosis* ( $n = 6$ ), *E. faecalis* ( $n = 5$ ), *S. aureus* ( $n = 17$ ), *S. aureus*



173 (MRSA) ( $n = 3$ ), *S. epidermidis* ( $n = 4$ ), *S. hominis* ( $n = 2$ ), *S. agalactiae* ( $n = 2$ ),  
174 *S. pneumoniae* ( $n = 10$ ), *S. viridans* ( $n = 2$ ).

175

176         These findings are consistent with past studies that showed the efficiency  
177 of MBL binding to live bacteria differs between isolates from the same bacterial  
178 genus and species, possibly due to differences in encapsulation [15,16]. Here we  
179 demonstrate this heterogeneity between MBL binding live isolates of the same  
180 species, but show upon exposure of previously cryptic binding sites using  
181 antibiotic disruption, that we were able to bind FcMBL to both isolates of the  
182 same species. To illustrate this point, we show the clinical isolates, *Escherichia*  
183 *coli* 41949 and *Streptococcus pneumoniae* 3, exhibited equivalent FcMBL  
184 binding whether they were live or fragmented with antibiotics (1 mg/mL cefepime  
185 or ceftriaxone, respectively, for 4 hours), whereas fragmented forms of *E. coli*  
186 RS218 and *S. pneumoniae* 19A isolates bound much more effectively to FcMBL  
187 than living forms (**Fig 3A-D**). This difference was further supported visually using  
188 scanning electron microscopy (SEM) in which magnetic FcMBL beads could be  
189 seen to bind both live and fragmented versions of *E. coli* 41949 and *S.*  
190 *pneumoniae* 3, but with *E. coli* RS218 and *S. pneumoniae* 19A, the FcMBL  
191 beads only bound to fragmented material (**Fig 3E-H**). FcMBL binding due to  
192 increases in fragmentation also correlated with LPS release measured using a  
193 limulus amoebocyte lysate (LAL) assay: equal amounts of LPS were detected for  
194 *E. coli* 41949 whether live or fragmented, whereas LPS levels were higher in  
195 antibiotic-treated *E. coli* RS218 (**Fig 3I,J**). These results suggest that antibiotic

196 treatment results in exposure of previously cryptic PAMPs in the cell wall,  
197 including toxins such as LPS, which leads to greatly increased binding of FcMBL.

198

199 **Fig 3. FcMBL bacterial binding efficiency can be enhanced with antibiotic**  
200 **treatment. (A-D)** PAMPs/mL detection by FcMBL ELLeCSA of both live (1e7  
201 CFU/mL) and fragmented bacteria using antibiotics (cefepime 1mg/mL or  
202 ceftriaxone 1 mg/mL). **(A)** *E. coli* 41949, **(B)** *S. pneumoniae* 3, **(C)** *E. coli* RS218,  
203 and **(D)** *S. pneumoniae* 19A. **(E-H)** Scanning electron microscopy images  
204 showing FcMBL bead (128 nm) capture of both live and fragmented bacteria  
205 using antibiotics (cefepime 1mg/mL or ceftriaxone 1 mg/mL). **(E)** *E. coli* 41949,  
206 **(F)** *S. pneumoniae* 3, **(G)** *E. coli* RS218, and **(H)** *S. pneumoniae* 19A. **(I, J)** LPS  
207 endotoxin measurement (LAL assay) using 1e7 CFU/mL of both live and  
208 fragmented bacteria using antibiotics (cefepime 1 mg/mL). **(I)** *E. coli* 41949 and  
209 **(J)** *E. coli* RS218.

210

211 In these studies, we found that 9 bacterial species, including multiple  
212 species of enterococcus and proteus, failed to bind to FcMBL even when treated  
213 for 4 hours with combinations of antibiotics (500 µg/mL vancomycin and 500  
214 µg/mL amikacin for Gram-positive isolates or 500 µg/mL cefepime + 500 µg/mL  
215 amikacin for Gram-negative isolates) (**Fig 2** and **Table 1**). Importantly however,  
216 FcMBL was able to detect 85% of the bacterial isolates (**Fig 4**), which includes 9  
217 of the 10 pathogens responsible for most healthcare-associated infections in

218 acute care hospitals in the U.S., with enterococcus species being the one  
219 exception [24].

220

221 **Fig 4. Summary of FcMBL pathogen capture. (Left)** Percent of live and  
222 fragmented Gram-negative ( $n = 119$ ) and Gram-positive ( $n = 78$ ) bacterial  
223 isolates bound by FcMBL ELLeCSA. **(Right)** Chart showing total number of  
224 isolates tested by FcMBL ELLeCSA for bacteria, fungi, viruses, parasites, and  
225 bacterial antigens, total number FcMBL bound, and total percent bound overall.

226

## 227 **FcMBL binding to bacterial cell wall components**

228 We further explored FcMBL's ability to bind cell wall components because  
229 when antibiotics were used to disrupt the membranes of Gram-negative isolates  
230 ( $n = 119$ ), there was a significant boost in FcMBL detection efficiency with  
231 fragmented cells (89%) versus live intact cells (61%) (**Fig 4**), and this is likely due  
232 to exposure of LPS that is present in high concentrations in their cell wall [25]. In  
233 contrast, FcMBL detected a greater percentage (71%) of live Gram-positive  
234 isolates ( $n = 78$ ), and this only slightly increased to 79% after antibiotic treatment  
235 (**Fig 4**) Thus, to better understand some of the major targets that FcMBL binds  
236 when bacteria are fragmented, we extended our analysis using purified samples  
237 of the hallmark PAMPs, LPS and LTA [25,26].

238 Using the ELLeCSA, we screened LPS purified from Gram-negative  
239 bacteria (*Serratia marcescens*, *Klebsiella pneumoniae*, and *Salmonella enterica*  
240 serovar enteritidis), as well as LTA from Gram-positive bacteria (*Enterococcus*

241 *hirae*, *Staphylococcus aureus*, and *Streptococcus pyogenes*). The ability of  
242 FcMBL to target these PAMPs was quantified in buffer (50mM Tris-HCl, 150mM  
243 NaCl, 0.05% Tween-20, pH 7.4 supplemented with 5mM CaCl<sub>2</sub> [TBST 5mM  
244 CaCl<sub>2</sub>]) to promote optimal MBL calcium-dependent binding, as well as in more  
245 clinically relevant human whole blood samples. We found that FcMBL was able  
246 to detect LPS from all 3 Gram-negative species in blood, however, the sensitivity  
247 was consistently lower than that detected in buffer (**Fig 5A-C**). FcMBL also  
248 bound to *E. hirae* LTA very well (15.6 ng/mL limit of detect in buffer and 62.5  
249 ng/mL in blood) (**Fig 5D**), which is consistent with past findings [27,28].  
250 Interestingly, FcMBL also bound to LTA from both *S. aureus* (**Fig 5E**) and *S.*  
251 *pyogenes* (**Fig 5F**) even though the same report that described MBL binds to *E.*  
252 *hirae* LTA claimed that it does not bind LTA from these species due to lack of  
253 glycosyl substituents [27,28].

254

255 **Fig 5. FcMBL ELLEcSA screening of purified lipopolysaccharide (LPS) and**  
256 **lipoteichoic acid (LTA).** LPS from **(A)** *S. marcescens*, **(B)** *K. pneumoniae*, and  
257 **(C)** *S. enterica* serovar enteritidis, and LTA from **(D)** *E. hirae*, **(E)** *S. aureus*, and  
258 **(F)** *S. pyogenes* were spiked into either TBST 5mM CaCl<sub>2</sub> buffer or whole human  
259 blood at indicated concentrations.

260

261 We next tested FcMBL's ability to bind lipoarabinomannan (LAM) and its  
262 biosynthetic precursors, phosphatidylinositol mannoside 1 & 2 and 6 (PIM<sub>1,2</sub> and  
263 PIM<sub>6</sub>) from *Mycobacterium tuberculosis* (TB) strain H37Rv [29,30]. LAM released

264 from metabolically replicating or degrading TB bacteria has been detected in both  
265 blood and urine [31,32]. Thus, we assessed the ability of FcMBL to capture and  
266 detect LAM, as well as PIM<sub>1,2</sub> and PIM<sub>6</sub>, spiked into both of these complex  
267 biological fluids as well as buffer. Our initial screen in buffer confirmed that  
268 FcMBL can detect LAM and PIM<sub>6</sub> at levels down to 1 ng/mL, but it did not detect  
269 PIM<sub>1,2</sub> (**Fig 6A-C**). FcMBL also bound to LAM in both blood and urine but its  
270 binding sensitivity was reduced as it could only detect 15.6 ng/mL. FcMBL  
271 binding to PIM<sub>6</sub> exhibited a similar sensitivity in buffer, but it could only detect  
272 62.5 ng/mL and 4 ng/mL in blood and urine, respectively.

273

274 **Fig 6. FcMBL ELLEcSA screening of *Mycobacterium tuberculosis* strain**  
275 **H37Rv glycolipids PIM<sub>1,2</sub>, PIM<sub>6</sub>, and LAM.** Glycolipids spiked into **(A)** buffer  
276 (TBST 5mM CaCl<sub>2</sub>), **(B)** whole human blood, and **(C)** urine. FcMBL detected  
277 PIM<sub>6</sub> and LAM at 1 ng/mL in buffer, but not PIM<sub>1,2</sub>. Sensitivity of PIM<sub>6</sub> and LAM is  
278 reduced in whole human blood and urine.

279

280 **FcMBL binding to fungi, parasites, viruses, and bacterial**  
281 **cell wall antigens**

282 In addition to screening multiple bacteria, we also tested FcMBL's ability to  
283 bind to 22 different species of fungi, 10 species of virus, 2 species of parasites,  
284 and 6 types of purified bacterial cell wall antigens (**Table 1**). In contrast to studies  
285 with bacteria, FcMBL was found to bind 100% of live fungal cells from all 22  
286 species and 23 isolates tested (**Fig 4**). Of the two parasites tested in this

287 preliminary analysis, only *Trichomonas vaginalis* was bound by FcMBL, whereas  
288 80% of the viruses screened and 92% of the purified bacterial cell wall antigens  
289 were detected (**Fig 4**). The handful of pathogen material FcMBL did not detect  
290 included the E1 protein from chikungunya virus, the NS1 protein from tick-borne  
291 encephalitis virus, *Plasmodium falciparum*, and PIM<sub>1,2</sub> from TB. In total, the  
292 overall FcMBL binding profile respectively detected 208 (86%) of the 241 isolates  
293 and 110 (90%) of the 122 different pathogen species tested.

294

## 295 **Discussion**

296 MBL has been reported to bind to over 90 different pathogen species as  
297 well as PAMPs released from these microbes based on studies in which binding  
298 was assessed by means of flow cytometry, ELISA, radio-immunoassay,  
299 immunofluorescence and SEM, or hemolytic assays [12-19]; however, different  
300 results have been obtained with different methods. Here we explored the broad  
301 spectrum binding capabilities of an engineered form of MBL, known as FcMBL,  
302 using a previously described magnetic ELLeCISA detection assay to quantify  
303 binding of MBL to over 200 different bacteria, fungi, viruses, parasites, and  
304 bacterial cell wall antigens. FcMBL was previously shown to bind to PAMPs  
305 released from 47 of 55 (85%) microbial species tested, including 38 species of  
306 bacteria and 9 species of fungi [23]. The FcMBL ELLeCISA also was able to  
307 detect infectious PAMPs in whole blood of sepsis patients, regardless of  
308 antibiotic therapy (blood culture positive or negative) with a detection sensitivity  
309 and specificity of 85% and 89%, respectively [23]. In the present study, we

310 utilized the ELLeCISA to compile a more comprehensive pathogen binding profile  
311 composed of over 200 isolates from more than 100 different pathogen species,  
312 which include not only bacteria and fungi, but also viruses, parasites, and  
313 bacterial cell wall antigens. Our results confirm that FcMBL binds to 86% of the  
314 isolates and 110 of the 122 species tested, which corresponds to a 90%  
315 detection sensitivity.

316 MBL binding to different clinical bacterial isolates of the same species has  
317 previously produced conflicting results [15,16]. These same studies also  
318 described that most Gram-negative isolates (encapsulated strains) bound little or  
319 no MBL. We have reported similar results as we previously found that FcMBL  
320 only bound 38% of live clinical *E. coli* isolates tested; however, upon  
321 fragmentation and release of PAMPs, FcMBL detection of these same isolates  
322 increased to 92% [23]. Broader examination of Gram-negative bacteria in the  
323 present study revealed a similar pattern: FcMBL only detected 73/119 (61%) of  
324 live isolates, but when these same microbes were treated with antibiotics, the  
325 detection sensitivity increased to 89% (106/119 isolates). Apparently, by treating  
326 the bacteria with antibiotics, we were able to disrupt the encapsulated cell wall,  
327 exposing and presenting previously hidden PAMPs, thereby increasing binding  
328 and reducing variability between isolates within the same bacterial species.  
329 However, even with cell wall disruption, FcMBL did not bind 9 bacterial species,  
330 including multiple isolates of *E. faecalis* and *P. mirabilis*. These microbes likely  
331 lack the complex polysaccharide antigens which FcMBL and MBL bind.  
332 Alternatively, the binding sites might still be present, but if they are, they remain

333 inaccessible due to the unique structure of their cell wall (e.g. carbohydrate  
334 conformation, sugar density or composition). Alternatively, the antibiotics we  
335 used might not be optimal for disrupting the cell wall in these cells.

336 To emphasize the ability of FcMBL to be used to detect the presence of a  
337 systemic pathogenic infection even when blood cultures are negative, we tested  
338 its ability to bind LPS and LTA that are major PAMP-associated toxins released  
339 by multiple species of bacteria. FcMBL was able to detect both LPS and LTA  
340 from all 6 bacterial species tested in both buffer and blood, although detection  
341 sensitivity was consistently higher in buffer. In addition, we explored whether  
342 FcMBL binds to the antigenic PAMPs, LAM, PIM<sub>1,2</sub>, and PIM<sub>6</sub> from *M.*  
343 *tuberculosis* H37Rv because these are active virulence factors associated with  
344 TB pathogenesis, and hence, they are critically important targets for point-of-care  
345 diagnostic and vaccine applications [33-36]. We found that FcMBL can detect  
346 LAM and PIM<sub>6</sub>, but not PIM<sub>1,2</sub>, in buffer, urine, and blood; this difference in  
347 binding is likely due to the fact that PIM<sub>1,2</sub> has 4 fewer branched mannose  
348 residues than PIM<sub>6</sub> [37].

349 In summary, FcMBL's ability to both bind to numerous types of infectious  
350 pathogens and capture many of the cell wall PAMPs released by these microbes  
351 when treated by antibiotics, in complex biological fluids further demonstrates the  
352 potential value of using FcMBL capture for rapid detection of bloodstream  
353 infections, even when blood cultures are negative. To our knowledge, this is the  
354 broadest range and largest number of pathogens and PAMPs that have been  
355 shown can be detected by a single blood opsonin or lectin. FcMBL's ability to



356 detect cell wall fragments synergizes well with standard of care antibiotic therapy,  
357 and it's broad-range pathogen capture and detection can be leveraged to  
358 develop a wide range of infectious disease diagnostics, therapeutics, and  
359 vaccines.

360

## 361 **Materials and methods**

### 362 **Pathogen sources**

363 Bacteria, fungi, viruses, parasites, and bacterial cell wall antigens were  
364 obtained from a multitude of sources which include: Abcam (Cambridge, USA),  
365 AERAS (Rockville, USA), American Type Culture Collection (Manassas, USA),  
366 Biodefense and Emerging Infections Resources (Manassas, USA), Boston  
367 Children's Hospital (Boston, USA), Brigham and Women's Hospital Crimson  
368 Biorepository (Boston, USA), Hospital Joseph-Ducuing (Toulouse, France),  
369 Sigma-Aldrich (St. Louis, USA), Sino Biological (Beijing, China), and The Native  
370 Antigen Company (Oxford, United Kingdom). In addition, the following defined  
371 strains were used in this study: *Streptococcus pneumoniae* 3 (ATCC 6303),  
372 *Streptococcus pneumoniae* 19A (ATCC 700674), *Escherichia coli* 41949  
373 (Multiple O antigens:H26) (Crimson Biorepository), and *Escherichia coli* RS218  
374 (NMEC O18:H7) (Kindly provided by James R. Johnson from the University of  
375 Minnesota). LPS from *Serratia marcescens* (L6136), *Klebsiella pneumoniae*  
376 (L4268), *Salmonella enterica* serovar enteritidis (L6011), and LTA from  
377 *Enterococcus hirae* (L4015), *Staphylococcus aureus* (L2515), and *Streptococcus*  
378 *pyogenes* (L3140) were purchased through Sigma-Aldrich. *Mycobacterium*

379 *tuberculosis* H37Rv components, which include lipoarabinomannan (LAM, NR-  
380 14848) and phosphatidylinositol mannoside 1,2 and 6 (PIM<sub>1,2</sub>, NR-14846 and  
381 PIM<sub>6</sub>, NR-14847), were obtained from BEI resources.

## 382 **Preparation of bacteria**

383 Bacteria were subcultured in RPMI (Thermo Fisher Scientific, USA) 10mM  
384 glucose to a McFarland of 0.5 (equivalent to ~1e8 CFU/mL). Bacteria were grown  
385 to this logarithmic phase to ensure cell viability, and RPMI is used because it  
386 does not contain interfering MBL binding nutrients, such as yeast extract. The  
387 culture was then split - live bacteria were kept on ice while the other half were  
388 fragmented. Fragmented bacterial PAMPs were generated using antibiotics.

389 Antibiotic treatment included the appropriate use of one of the following:  
390 cefepime (NDC 25021-121-20), ceftriaxone (NDC 60505-6104-4), meropenem  
391 (NDC 63323-507-20), amikacin (NDC 0703-9040-03), or vancomycin (NDC  
392 0409-4332-49), at 1 mg/mL for  $\geq 4$  hours at 37°C 225 rpm. Testing by FcMBL  
393 ELLeCSA was performed on titers of both live and fragmented bacteria at  $\leq 1e7$   
394 CFU/mL. LPS endotoxin from Gram-negative bacteria was quantified using a  
395 limulus amoebocyte lysate (LAL) assay ([Endosafe®] Charles River Laboratories,  
396 USA).

## 397 **Preparation of fungi, viruses, parasites, and bacterial** 398 **cell wall antigens**

399 Fungi species were primarily propagated in RPMI 10mM glucose,  
400 however other media, such as potato dextrose broth (Teknova, USA), were used

401 to facilitate growth. In these cases, the fungal cells were pelleted at  $3,000 \times g$  for  
402 5 minutes at 22°C (Eppendorf 5424, USA), washed 3x in 50mM Tris-HCl, 150mM  
403 NaCl, 0.05% Tween-20, 5mM CaCl<sub>2</sub>, pH 7.4 (TBST 5mM CaCl<sub>2</sub>) (Boston  
404 BioProducts, USA) to remove residual growth media, and then resuspended in  
405 TBST 5mM CaCl<sub>2</sub>. Testing by FcMBL ELLeCSA was performed on titers of live  
406 fungi at  $\leq 1e7$  CFU/mL. Purified or inactivated viral, parasite, and bacterial cell  
407 wall antigens were resuspended or diluted in TBST 5mM CaCl<sub>2</sub> for testing  
408 directly by FcMBL ELLeCSA.

### 409 **FcMBL ELLeCSA**

410 The key metric used to quantify direct FcMBL binding to pathogen-  
411 associated molecular patterns (PAMPs) from bacteria, fungi, viruses, parasites,  
412 and bacterial cell wall antigens is a 96 well ELLeCSA, which has been previously  
413 published [23]. The assay uses FcMBL coated superparamagnetic beads (1  $\mu$ m  
414 MyOne Dynabead [Thermo Fisher Scientific, USA]) where FcMBL, biotinylated at  
415 the N termini of the Fc protein using an N-terminal amino-oxy reaction, is coupled  
416 to streptavidin beads in an oriented array (**Fig 1**). Each sample is screened using  
417 5  $\mu$ g of the FcMBL beads, 200  $\mu$ L test sample, and 800  $\mu$ L TBST 5mM CaCl<sub>2</sub>  
418 supplemented with 10mM glucose (50mM heparin is added if testing blood).  
419 PAMPs in the test sample are captured by FcMBL for 20 minutes at 22°C 950  
420 rpm in a plate shaker (Eppendorf, USA). Using an automated magnetic-handling  
421 system (KingFisher™ Flex [not shown]) (Thermo Fisher Scientific, USA),  
422 captured PAMPs are washed two times using TBST 5mM CaCl<sub>2</sub>, and detected  
423 with human MBL (Sino Biological) linked to horseradish peroxidase (MBL-HRP).

424 Non-specific MBL-HRP is removed by 4 washes in TBST 5mM CaCl<sub>2</sub>, and  
425 PAMPs are quantified with 1-step ultra tetramethylbenzidine (TMB) substrate  
426 (Thermo Fisher Scientific, USA). Finally, the reaction is quenched with 1N  
427 sulfuric acid and results are read at the optical density 450 nm wavelength.  
428 Quantification of bound PAMPs is determined using a standard curve generated  
429 using yeast mannan – a known target for MBL (1 ng/mL mannan = 1 PAMP unit)  
430 [38]. PAMP units are multiplied back by the dilution factor (×5) of the test sample  
431 volume to give PAMPs/mL. Previously, a receiver operating characteristic  
432 comparison was performed for a small pilot sepsis patient study in which each  
433 sepsis blood draw was analyzed versus non-infected controls to determine an  
434 optimal ELLeCSA threshold of 0.45 PAMP units [23]. Therefore, in this study we  
435 define and report FcMBL binding to a sample as having  $\geq 2.25$  PAMPs/mL. To  
436 confirm specificity of FcMBL binding, a negative control (FcMBL null) was used  
437 alongside FcMBL in the ELLeCSA. The FcMBL null was engineered by  
438 introducing two residue mutations, E347A and N349A, into aktFcMBL (GenBank  
439 accession: KJ710775.1) to remove functional binding of the CRD of MBL. FcMBL  
440 null was purified and used to coat beads in the same fashion as FcMBL  
441 described above for direct comparison. FcMBL null beads did not support any  
442 binding to yeast mannan.

## 443 **Scanning electron microscopy**

444 For visualization of live and fragmented bacteria on FcMBL beads,  
445 bacteria were captured with 128 nm FcMBL beads (Ademtech, France), spun  
446 down onto 13mm coverslips and fixed with 2.5% glutaraldehyde in 0.1M sodium

447 cacodylate buffer (Electron Microscopy Sciences, USA) for 1 hour. Cover slips  
448 were incubated in 1% osmium tetroxide in 0.1M sodium cacodylate (Electron  
449 Microscopy Sciences, USA) for 1 hour. Ascending grades of ethanol dehydrated  
450 the sample before being chemically dried with hexamethyldisilazane (Electron  
451 Microscopy Sciences, USA). Samples were then placed in a desiccator  
452 overnight. Dried samples are mounted on aluminum stubs, sputter-coated with a  
453 thin layer of gold particles, and imaged using a Zeiss Supra55VP microscope.

454

## 455 **Acknowledgments**

456 We thank Vasanth Chandrasekhar for assistance in making the FcMBL  
457 beads, Shanda Lightbown for SEM images of *S. pneumoniae* 3, and Seth Kroll  
458 for image processing.

459

## 460 **References**

- 461 1. Takahashi K. Mannose-binding lectin and the balance between immune  
462 protection and complication. *Expert Rev Anti Infect Ther.* 2011  
463 Dec;9(12):1179-90.
- 464 2. Kilpatrick DC. Mannan-binding lectin: clinical significance and  
465 applications. *Biochim Biophys Acta.* 2002 Sep 19;1572(2-3):401-13.
- 466 3. Nuytinck L, Shapiro F. Mannose-binding lectin: laying the stepping stones  
467 from clinical research to personalized medicine. *Per Med.* 2004  
468 Dec;1(1):35-52.

- 469       **4.** Eisen DP, Minchinton RM. Impact of mannose-binding lectin on  
470       susceptibility to infectious diseases. *Clin Infect Dis*. 2003 Dec  
471       1;37(11):1496-505.
- 472       **5.** Larvie M, Shoup T, Chang W, Chigweshe L, Hartshorn K, White MR, et al.  
473       Mannose-binding lectin binds to amyloid  $\beta$  protein and modulates  
474       inflammation. *J Biomed Biotechnol*. 2012;2012:929803.
- 475       **6.** Mogensen TH. Pathogen recognition and inflammatory signaling in innate  
476       immune defenses. *Clin Microbiol Rev*. 2009 Apr;22(2):240-73.
- 477       **7.** Saito T, Owen DM, Jiang F, Marcotrigiano J, Gale M Jr. Innate immunity  
478       induced by composition-dependent RIG-I recognition of hepatitis C virus  
479       RNA. *Nature*. 2008 Jul 24;454(7203):523-7.
- 480       **8.** Kang HJ, Lee S, Lee H, Kim JY, Lee B, Yum J, et al. Mannose-binding  
481       lection without the aid of its associated serine proteases alters  
482       lipopolysaccharide-mediated cytokine/chemokine secretion from human  
483       endothelial cells. *Immunology*. 2007 Nov;122(3):335-42.
- 484       **9.** Wallis R. Interactions between mannose-binding lectin and MASPs during  
485       complement activation by the lectin pathway. *Immunobiology*. 2007;212(4-  
486       5):289-99.
- 487       **10.** Degn SE, Thiel S. Humoral pattern recognition and the complement  
488       system. *Scand J Immunol*. 2013 Aug;78(2):181-93.
- 489       **11.** Fraser IP, Koziel H, Ezekowitz RA. The serum mannose-binding protein  
490       and the macrophage mannose receptor are pattern recognition molecules

- 491 that link innate and adaptive immunity. *Semin Immunol.* 1998  
492 Oct;10(5):363-72.
- 493 **12.** Dommett RM, Klein N, Turner MW. Mannose-binding lectin in innate  
494 immunity: past, present and future. *Tissue Antigens.* 2006 Sep;68(3):193-  
495 209.
- 496 **13.** Polotsky VY, Belisle JT, Mikusova K, Ezekowitz RAB, Joiner KA.  
497 Interaction of human mannose-binding protein with *Mycobacterium avium*.  
498 *J Infect Dis.* 1997 May;175(5):1159-68.
- 499 **14.** Townsend R, Read RC, Turner MW, Klein NJ, Jack DL. Differential  
500 recognition of obligate anaerobic bacteria by human mannose-binding  
501 lectin. *Clin Exp Immunol.* 2001 May;124(2):223-8.
- 502 **15.** Neth O, Jack DL, Dodds AW, Holzel H, Klein NJ, Turner MW. Mannose-  
503 binding lectin binds to a range of clinically relevant microorganisms and  
504 promotes complement deposition. 2000 Feb;68(2):688-93.
- 505 **16.** van Emmerik LC, Kuijper EJ, Fijen CA, Dankert J, Thiel S. Binding of  
506 mannan-binding protein to various bacterial pathogens of meningitis. *Clin*  
507 *Exp Immunol.* 1994 Sep;97(3):411-6.
- 508 **17.** Saifuddin M, Hart ML, Gewurz H, Zhang Y, Spear GT. Interaction of  
509 mannose-binding lectin with primary isolates of human immunodeficiency  
510 virus type 1. *J Gen Virol.* 2000 Apr;81(Pt 4):949-55.
- 511 **18.** Klabunde J, Berger J, Jensenius JC, Klinkert MQ, Zelck UE, Kremsner  
512 PG, et al. *Schistosoma mansoni*: adhesion of mannan-binding lectin to

- 513 surface glycoproteins of cercariae and adult worms. *Exp Parasitol*. 2000  
514 Aug;95(4):231-9.
- 515 **19.** Kuipers S, Aerts PC, van Dijk H. Differential microorganism-induced  
516 mannose-binding lectin activation. *FEMS Immunol Med Microbiol*. 2003  
517 May 15;36(1-2):33-9.
- 518 **20.** Kang JH, Super M, Wing Yung C, Cooper RM, Domansky K, Graveline  
519 AR, et al. An extracorporeal blood-cleansing device for sepsis therapy.  
520 *Nat Med*. 2014 Oct;20(10):1211-6.
- 521 **21.** Didar TF, Cartwright MJ, Rottman M, Graveline AR, Gamini N, Watters  
522 AL, et al. Improved treatment of systemic blood infections using antibiotics  
523 with extracorporeal opsonin hemoadsorption. *Biomaterials*. 2015  
524 Oct;67:382-92.
- 525 **22.** Bicart-See A, Rottman M, Cartwright M, Seiler B, Gamini N, Rodas M, et  
526 al. Rapid isolation of *Staphylococcus aureus* pathogens from infected  
527 clinical samples using magnetic beads coated with Fc-Mannose Binding  
528 Lectin. *PLOS ONE*. 2016 Jun 8;11(6):e0156287.
- 529 **23.** Cartwright M, Rottman M, Shapiro NI, Seiler B, Lombardo P, Gamini N, et  
530 al. A broad-spectrum infection diagnostic that detects pathogen-  
531 associated molecular patterns (PAMPs) in whole blood. *EBioMedicine*.  
532 2016 Jul;9:217-227.
- 533 **24.** Magill SS, Edwards JR, Bamberg W, Beldavs ZG, Dumyati G, Kainer MA,  
534 et al. Multistate point-prevalence survey of health care-associated  
535 infections. *N Engl J Med*. 2014 Mar 27;370(13):1198-208.



- 536       **25.** Rosenfeld Y, Shai Y. Lipopolysaccharide (Endotoxin)-host defense  
537           antibacterial peptides interactions: Role in bacterial resistance and  
538           prevention of sepsis. *Biochim Biophys Acta*. 2006 Sep;1758(9):1513-22.
- 539       **26.** Sharma P, Dube D, Singh A, Mishra B, Singh N, Sinha M, et al. Structural  
540           basis of recognition of pathogen-associated molecular patterns and  
541           Inhibition of proinflammatory cytokines by camel peptidoglycan recognition  
542           protein. *J Biol Chem*. 2011 May 6;286(18):16208-17.
- 543       **27.** Lynch NJ, Roscher S, Hartung T, Morath S, Matsushita M, Maennel DN,  
544           et al. L-Ficolin Specifically binds to lipoteichoic acid, a cell wall constituent  
545           of Gram-positive bacteria, and activates the lectin pathway of  
546           complement. *J Immunol*. 2004 Jan 15;172(2):1198-202.
- 547       **28.** Polotsky VY, Fischer W, Ezekowitz RA, Joiner KA. Interactions of human  
548           mannose-binding protein with lipoteichoic acids. *Infect Immun*. 1996  
549           Jan;64(1):380-3.
- 550       **29.** Vergne I, Gilleron M, Nigou J. Manipulation of the endocytic pathway and  
551           phagocyte functions by *Mycobacterium tuberculosis* lipoarabinomannan.  
552           *Front Cell Infect Microbiol*. 2015 Jan 12;4:187.
- 553       **30.** Rojas RE, Thomas JJ, Gehring AJ, Hill PJ, Belisle JT, Harding CV, et al.  
554           Phosphatidylinositol mannoside from *Mycobacterium tuberculosis* binds  
555            $\alpha 5\beta 1$  integrin (VLA-5) on CD4+ T cells and induces adhesion to  
556           fibronectin. *J Immunol*. 2006 Sep 1;177(5):2959-68.

- 557       **31.** Iskandar A, Nursiloningrum E, Arthamin MZ, Olivianto E, Chandrakusuma  
558           MS. The diagnostic value of urine lipoarabinomannan (LAM) antigen in  
559           childhood tuberculosis. *J Clin Diagn Res.* 2017 Mar;11(3):EC32-EC35.
- 560       **32.** Sakamuri RM, Price DN, Lee M, Cho SN, Barry 3rd CE, Via LE, et al.  
561           Association of lipoarabinomannan with high density lipoprotein in blood:  
562           implications for diagnostics. *Tuberculosis (Edinb).* 2013 May;93(3):301-7.
- 563       **33.** Lawn SD. Point-of-care detection of lipoarabinomannan (LAM) in urine for  
564           diagnosis of HIV-associated tuberculosis: a state of the art review. *BMC*  
565           *Infect Dis.* 2012 Apr 26;12:103.
- 566       **34.** Boonyarattanakalin S, Liu X, Michieletti M, Lepenies B, Seeberger PH.  
567           Chemical synthesis of all phosphatidylinositol mannoside (PIM) glycans  
568           from *Mycobacterium tuberculosis*. *J Am Chem Soc.* 2008 Dec  
569           10;130(49):16791-9.
- 570       **35.** Kallert S, Zenk SF, Walther P, Grieshaber M, Weil T, Stenger S.  
571           Liposomal delivery of lipoarabinomannan triggers *Mycobacterium*  
572           tuberculosis specific T-cells. *Tuberculosis.* 2015 95:452-462.
- 573       **36.** Shin H, Franco LH, Vidhya NR, Collins AC, Shiloh MU. A baculovirus-  
574           conjugated mimotope vaccine targeting *Mycobacterium tuberculosis*  
575           lipoarabinomannan. *PLOS ONE.* 2017 Oct 5;12(10):e0185945.
- 576       **37.** Rodriguez ME, Loyd CM, Ding X, Karim AF, McDonald DJ, Canaday DH,  
577           et al. Mycobacterial phosphatidylinositol mannoside 6 (PIM6) up-regulates  
578           TCR-Triggered HIV-1 replication in CD4+ T cells. *PLOS ONE.* 2013 Nov  
579           25;8(11):e80938.

580       **38.** Super M, Thiel S, Lu J, Levinsky RJ, Turner MW. Association of low levels  
581           of mannan-binding protein with a common defect of opsonisation. *Lancet*.  
582           1989 Nov 25;2(8674):1236-9.

**Fig. 1**

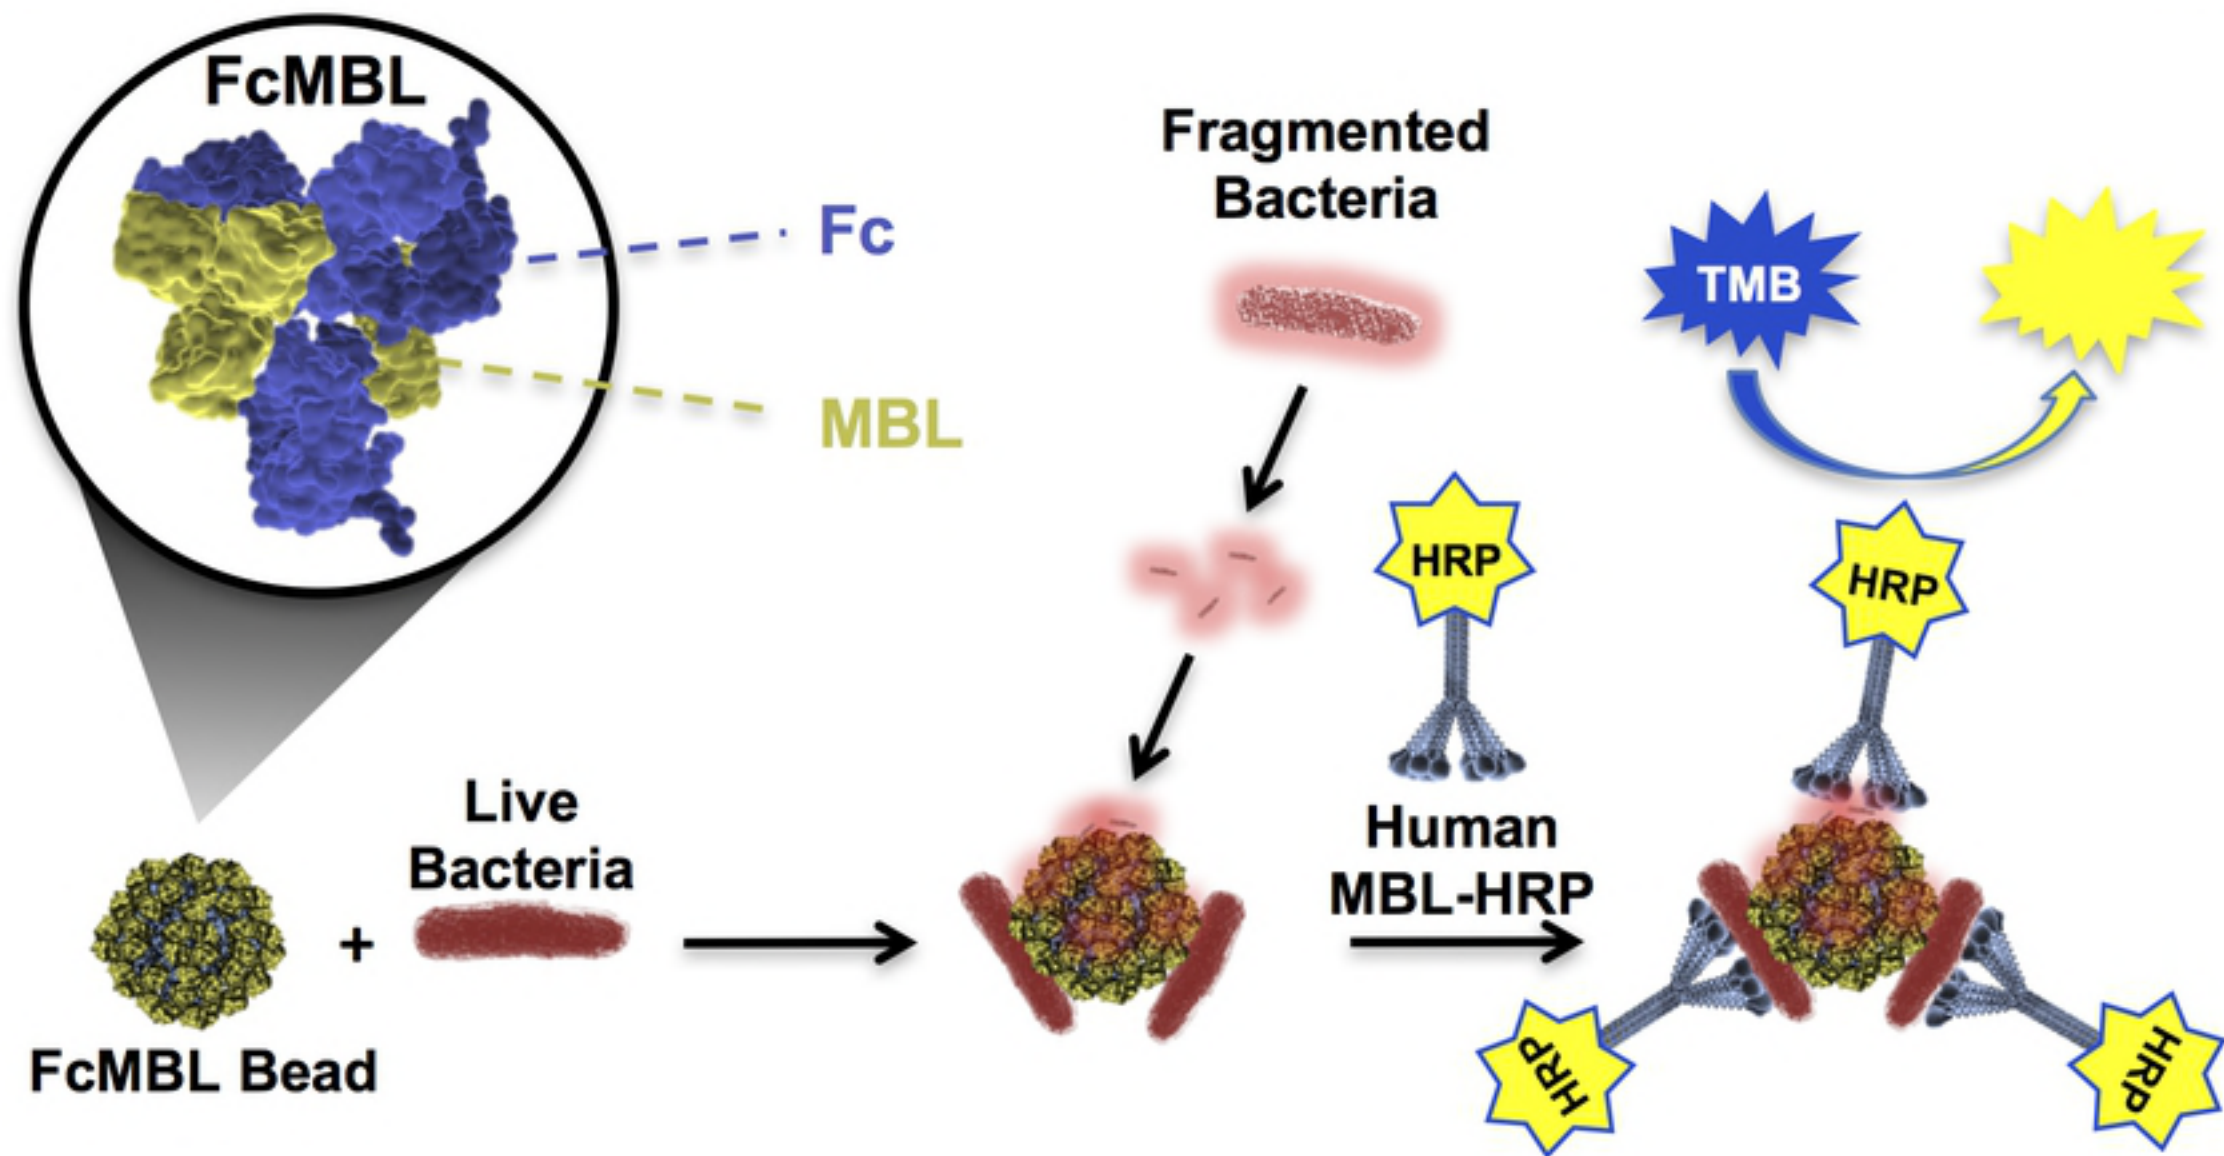

Fig. 2

### FcMBL Binding to Bacterial Isolates

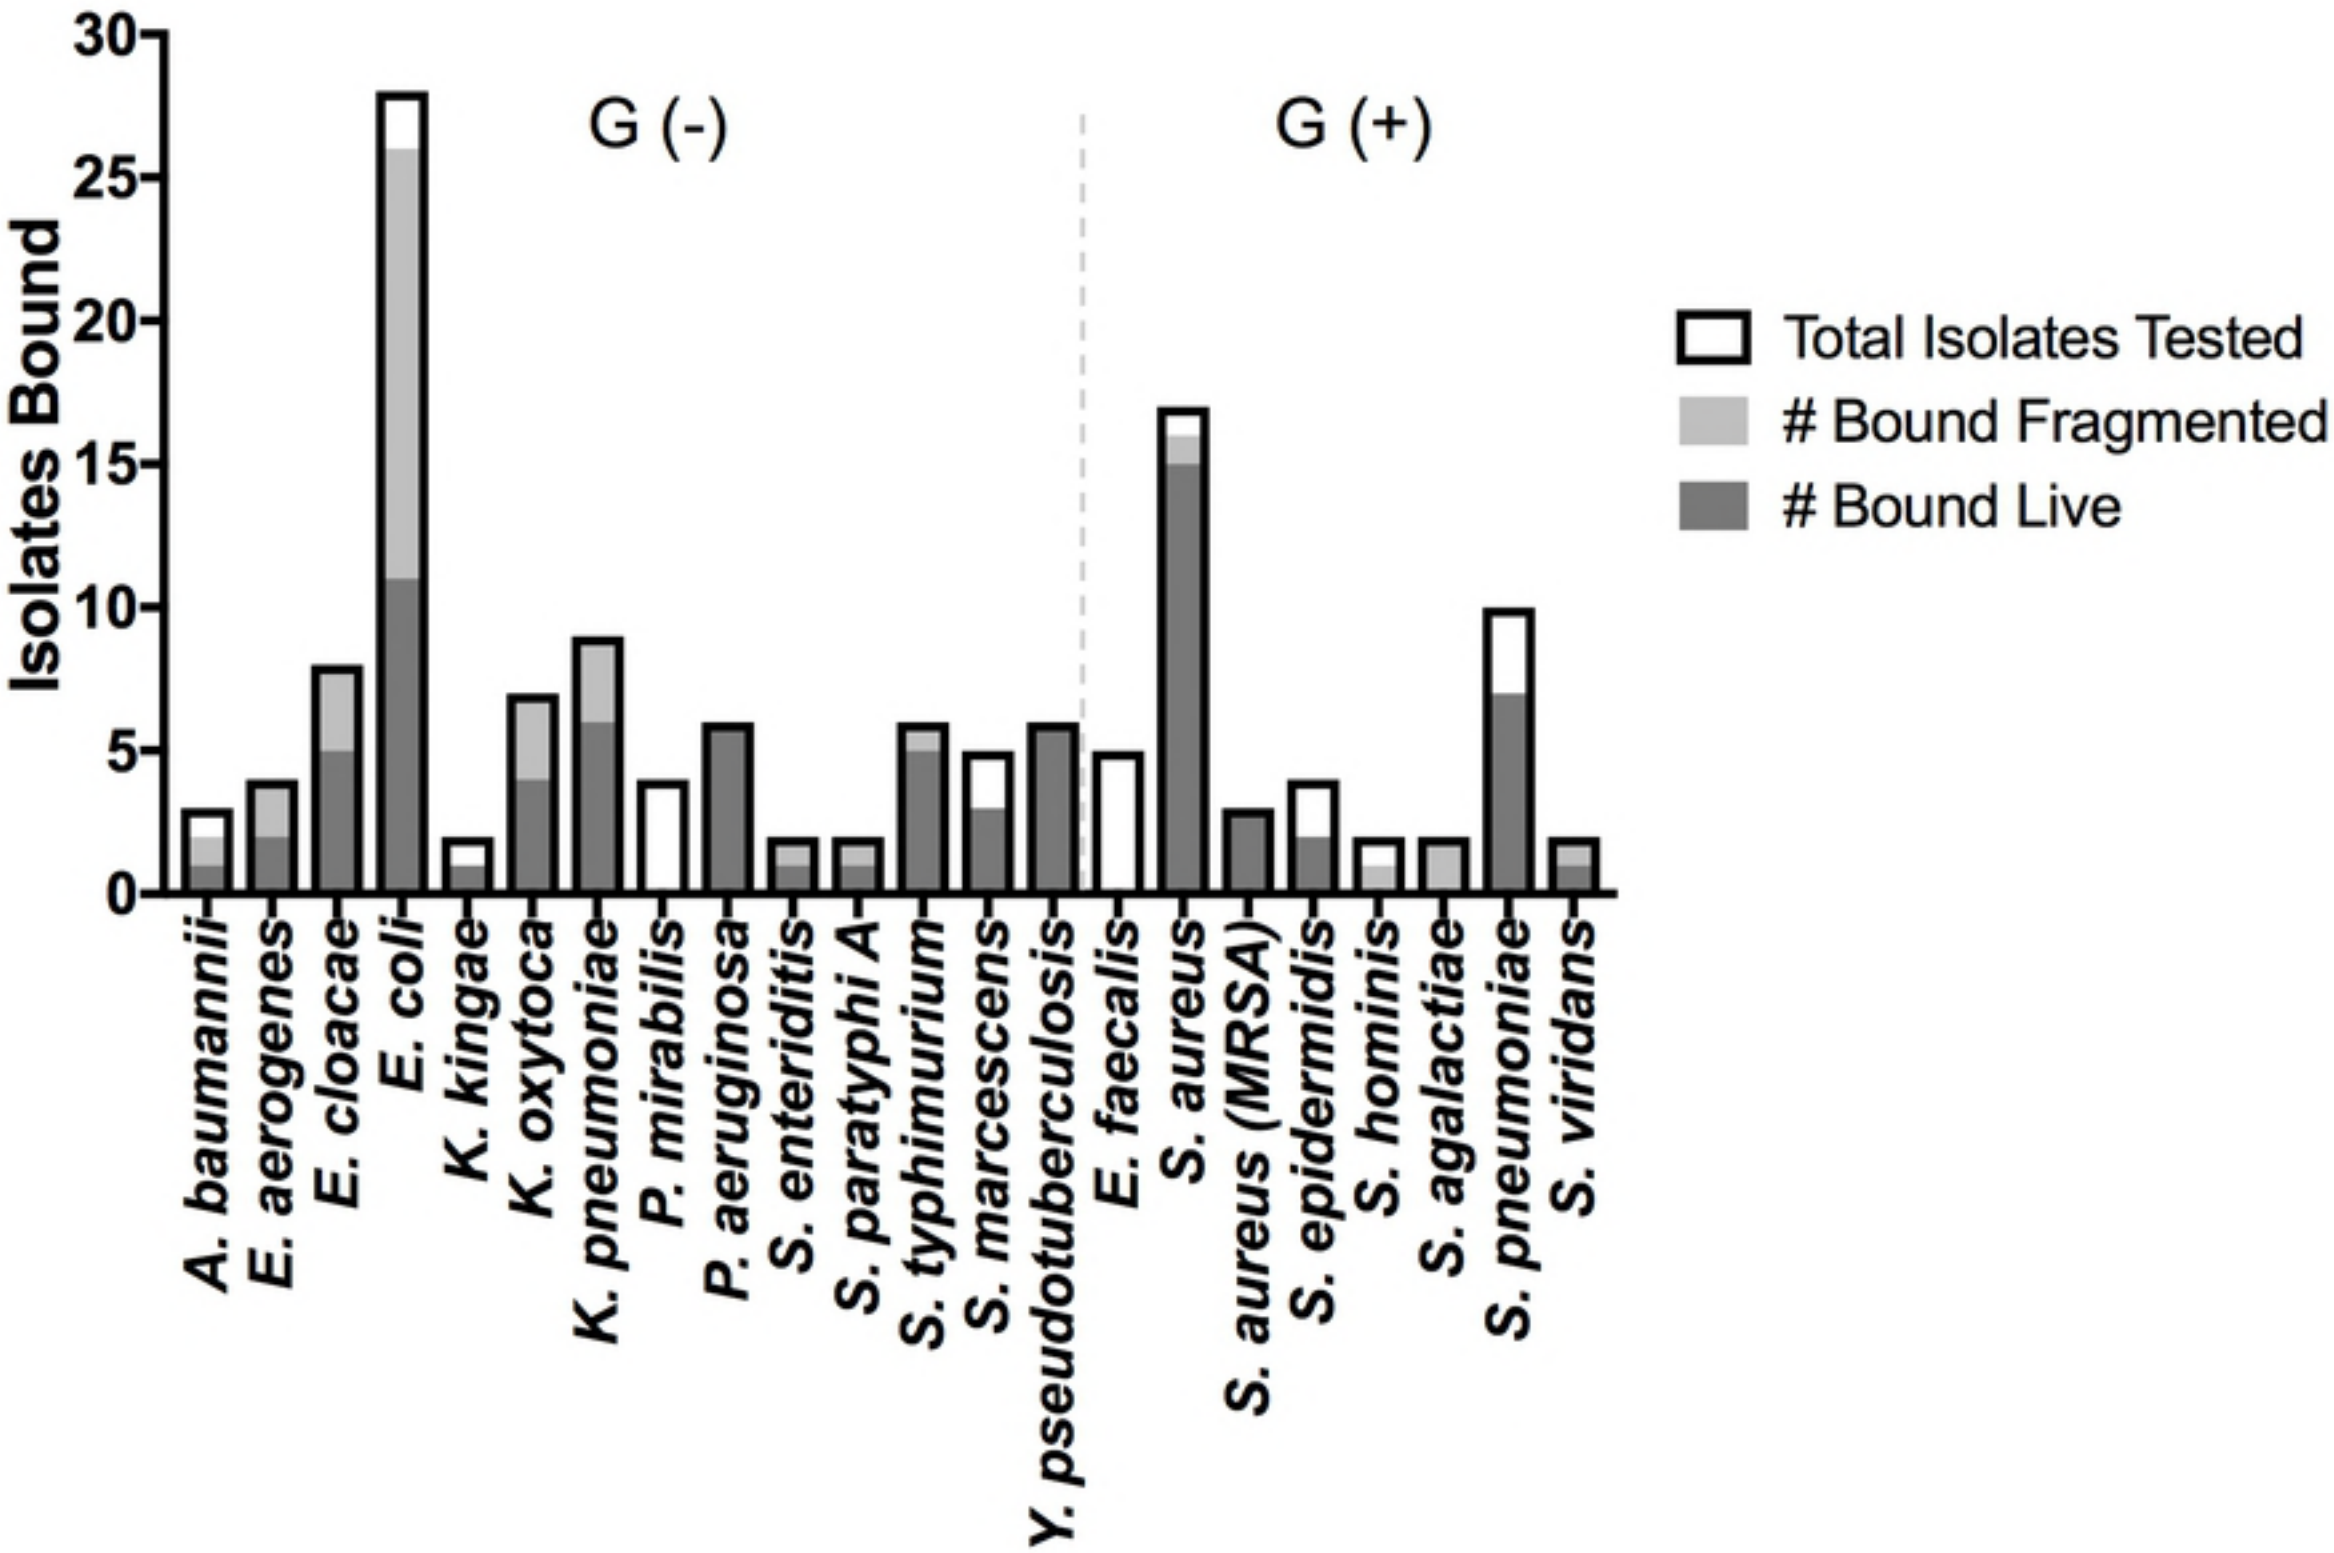



**Fig. 3*****E. coli* 41949*****S. pneumoniae* 3*****E. coli* RS218*****S. pneumoniae* 19A****A**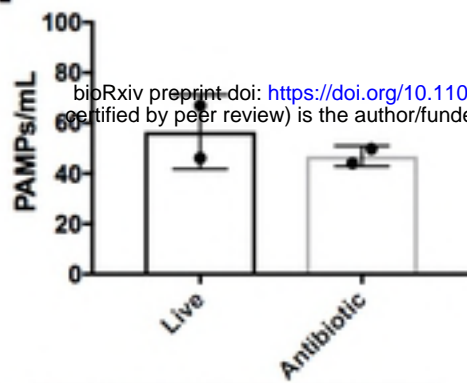**B**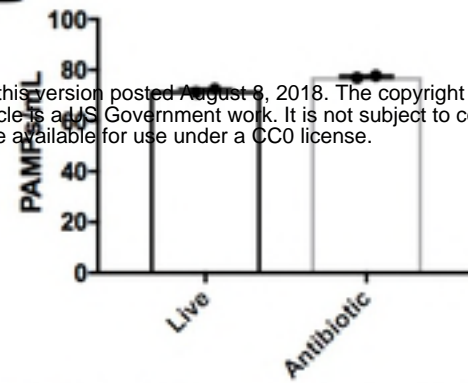**C**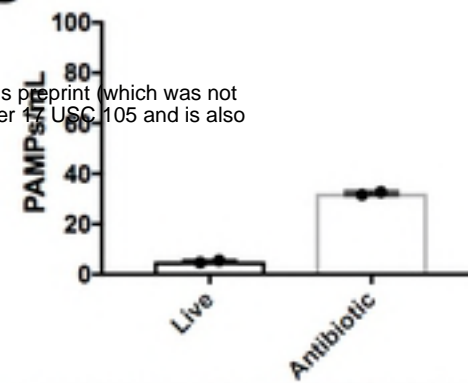**D**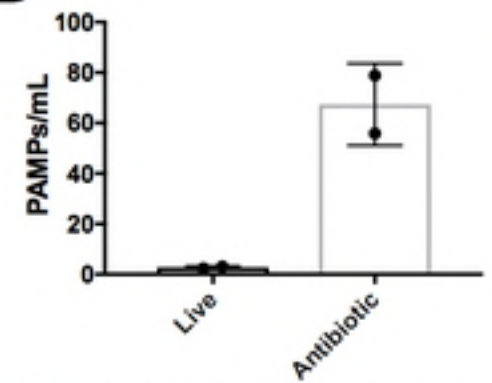**E**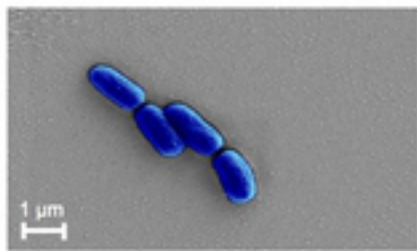**Live**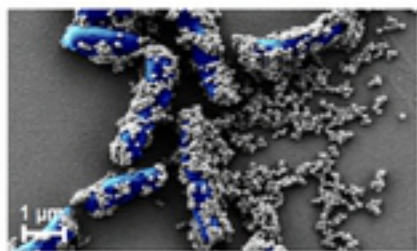**Live + FcMBL**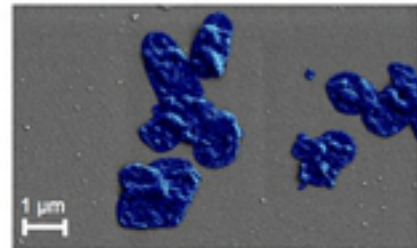**Antibiotic**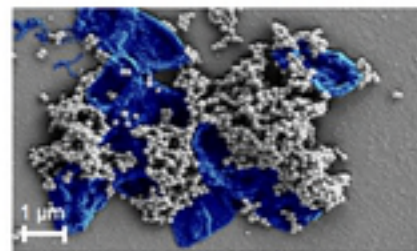**Antibiotic +  
FcMBL Beads****F**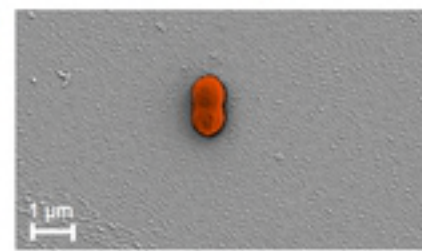**Live**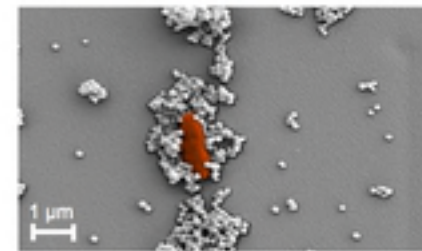**Live + FcMBL**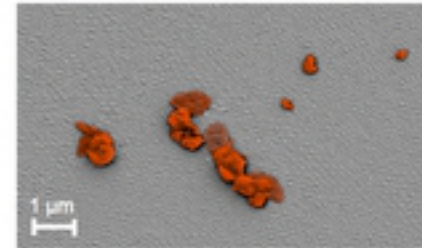**Antibiotic**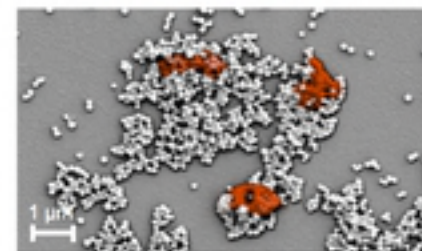**Antibiotic +  
FcMBL Beads****G**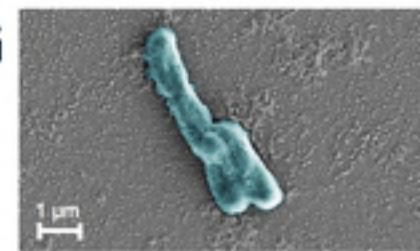**Live**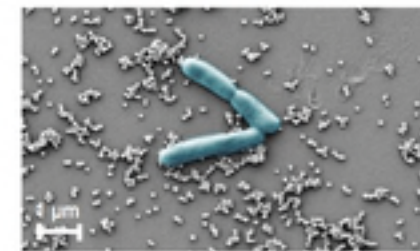**Live + FcMBL**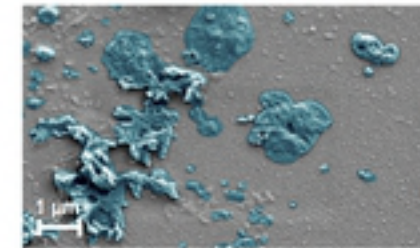**Antibiotic**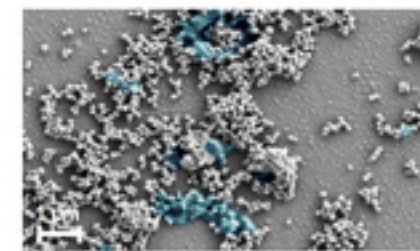**Antibiotic +  
FcMBL Beads****H**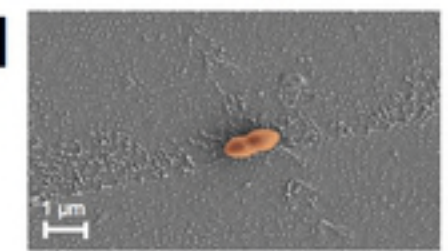**Live**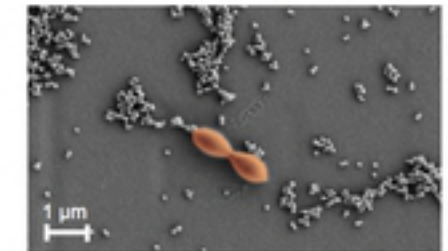**Live + FcMBL**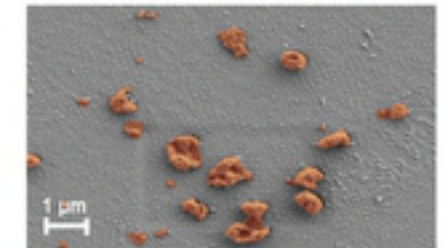**Antibiotic**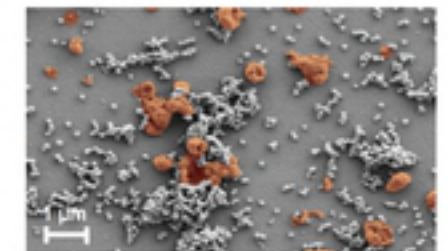**Antibiotic +  
FcMBL Beads****I**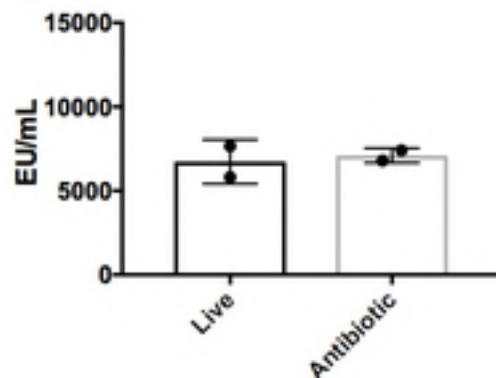**J**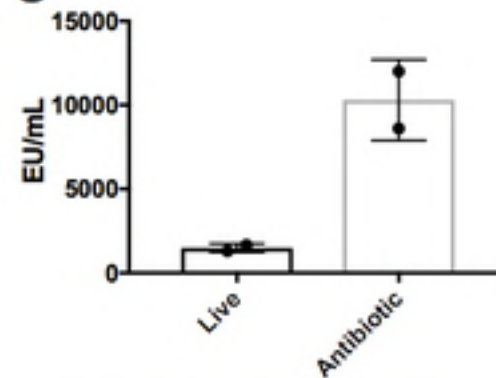

**Fig. 4**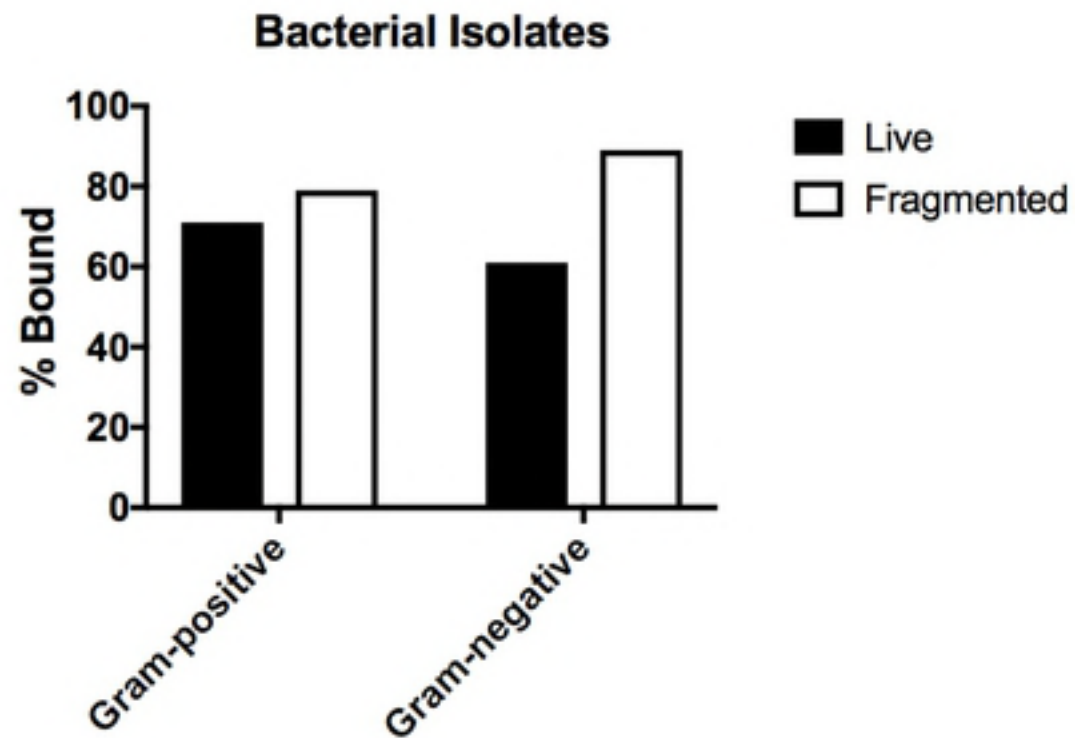

|                           | Total Isolates Tested | FcMBL Bound | % Bound |
|---------------------------|-----------------------|-------------|---------|
| <b>Bacteria</b>           | 206                   | 176         | 85      |
| <b>Fungi</b>              | 23                    | 23          | 100     |
| <b>Viruses</b>            | 10                    | 8           | 80      |
| <b>Parasites</b>          | 2                     | 1           | 50      |
| <b>Bacterial Antigens</b> | 12                    | 11          | 92      |



**Fig. 5**

**A**

*S. marcescens* LPS

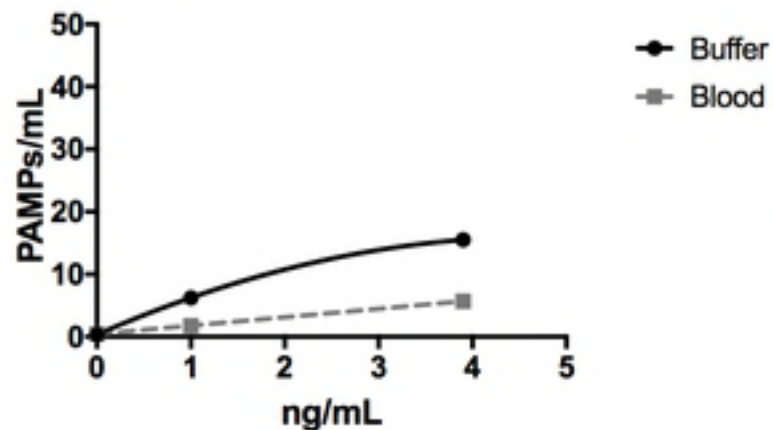

**B**

*K. pneumoniae* LPS

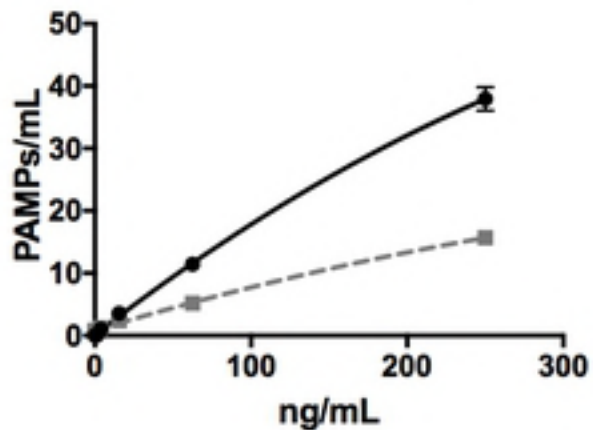

**C**

*S. enterica* serotype enteritidis LPS

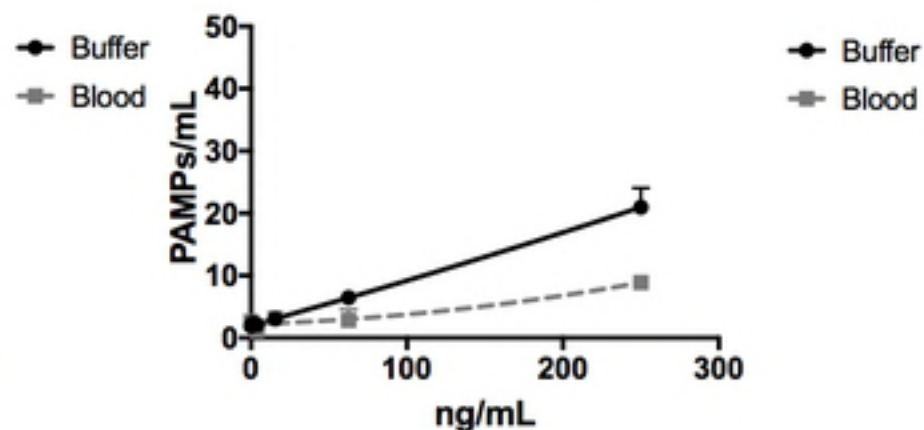

**D**

*E. hirae* LTA

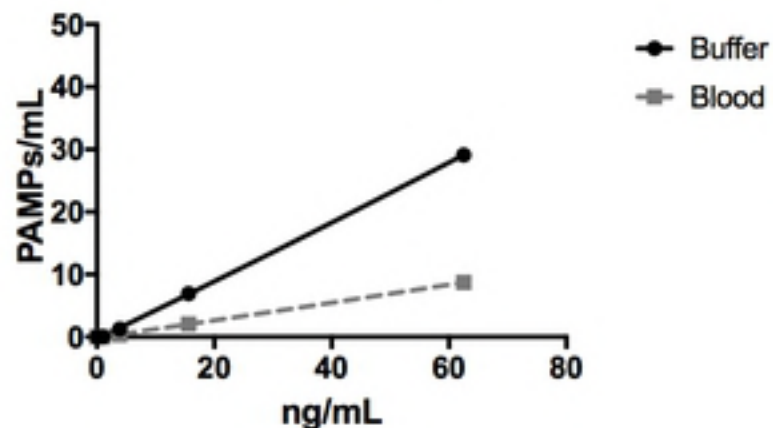

**E**

*S. aureus* LTA

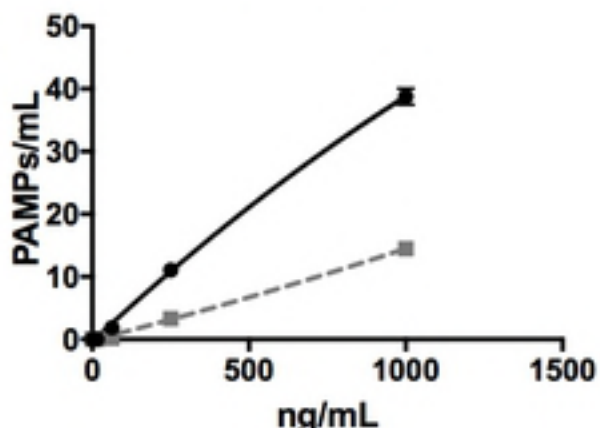

**F**

*S. pyogenes* LTA

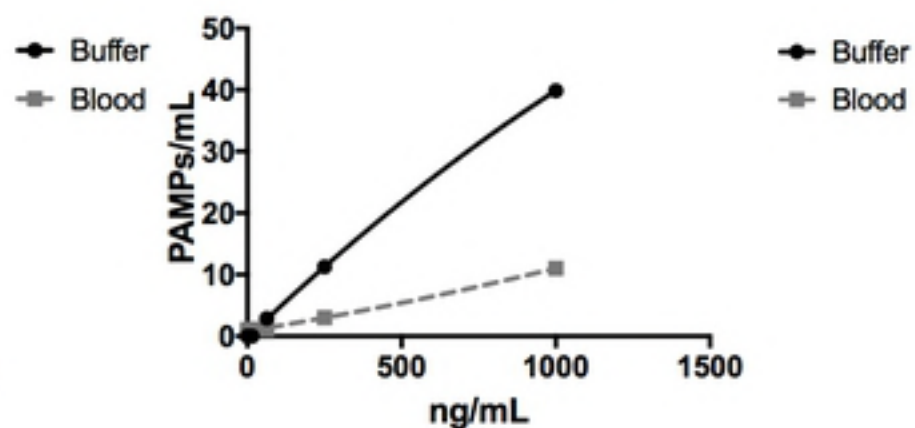



# Fig. 6

## A

Buffer

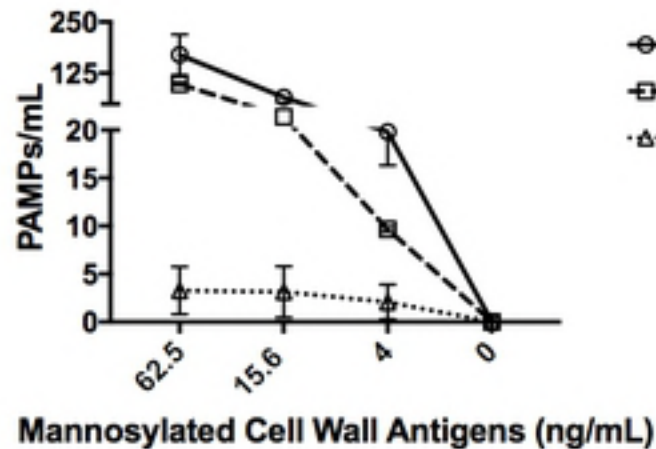

## B

Blood

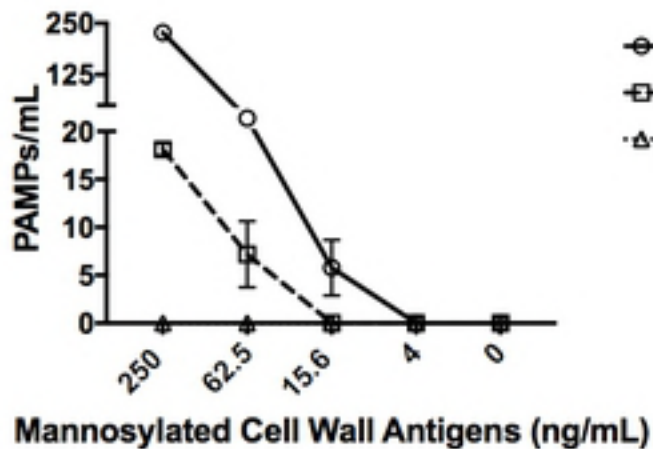

## C

Urine

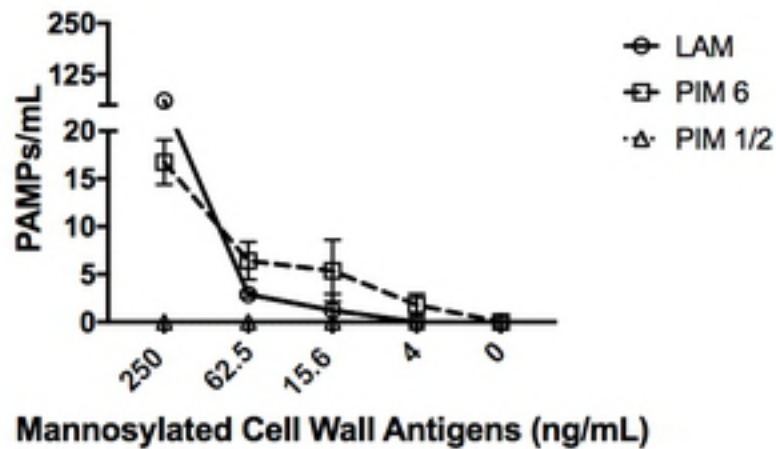

Source: https://www.biorxiv.org/content/10.1101/387589v1.full.pdf
